# Supplementary material for: Whole Genome Association Study of the Plasma Metabolome Identifies Metabolites Linked to Cardiometabolic Disease in Black Individuals
Source: PubMed Central journal article supplement (PMC9395431; doi:10.1038/s41467-022-32275-3), 2022-08-22

## **Supplementary Material**

1. Supplementary Table 1: Clinical characteristics in Jackson Heart Study
2. Supplementary Table 2: MSI and study-based metabolite classification
3. Supplementary Methods
4. Supplementary Figure 1: Unknown metabolite identification using chemical standards

| <b>Clinical Trait</b>        | <b>Full Cohort (N=5301)</b> | <b>WGAS (N=2,466)</b> |
|------------------------------|-----------------------------|-----------------------|
| <b>Age, mean (SD)</b>        | 55.4 (12.8)                 | 56 (12.7)             |
| <b>BMI, mean (SD)</b>        | 31.8 (7.2)                  | 31.7 (7.1)            |
| <b>eGFR, mean (SD)</b>       | 85.7 (18.5)                 | 85.5 (18.3)           |
| <b>TC, mean (SD)</b>         | 199 (40.1)                  | 199.8 (41)            |
| <b>HDL, mean (SD)</b>        | 51.8 (14.6)                 | 51.8 (14.7)           |
| <b>sbp, mean (SD)</b>        | 127 (18.4)                  | 127 (18.1)            |
| <b>Male, n (%)</b>           | 1934 (36.5)                 | 938 (38)              |
| <b>Current Smoker, n (%)</b> | 693 (13.1)                  | 293 (11.9)            |
| <b>HTN, n (%)</b>            | 3252 (61.3)                 | 1530 (62)             |
| <b>Diabetes, n (%)</b>       | 1152 (21.7)                 | 506 (20.5)            |

**Supplementary Table 1: Clinical characteristics between the entire Jackson Heart Study, available and profiled samples.** BMI: body mass index; eGFR: estimated glomerular filtration rate; TC: total cholesterol, HDL: high density lipid lipoprotein; sbp: systolic blood pressure; HTN: hypertension

| <b>MSI Descriptor</b>                                     | <b>MSI Classification</b>                                                       | <b>Study Classification</b>                                                                              |
|-----------------------------------------------------------|---------------------------------------------------------------------------------|----------------------------------------------------------------------------------------------------------|
| <u>Class 1:</u> Identified Metabolite                     | Match to an authentic reference standard                                        | <u>Category 1:</u> Match to an authentic reference standard                                              |
|                                                           |                                                                                 | <u>Category 2:</u> Cluster with known compound (previously confirmed with standard)                      |
| <u>Class 2:</u> Putatively Annotated Metabolite           | Matching physicochemical properties/similar spectra to known compound           | <u>Category 3:</u> MS/MS match using GNPS database                                                       |
| <u>Class 3:</u> Putatively characterized metabolite class | Matching physicochemical properties/similar spectra to known class of compounds | <u>Category 4:</u> Spectra match to representative compound from metabolite family from in house library |
| N/A                                                       | N/A                                                                             | <u>Category 5:</u> SIRIUS metabolite prediction                                                          |
| N/A                                                       | N/A                                                                             | <u>Category 6:</u> HMDB match                                                                            |

**Supplementary Table 2: Metabolomics Standard Initiative and Study Metabolite Classification Scheme.** MSI: Metabolite Standard Initiative; HMDB: Human Metabolome Database

# Supplementary Methods

## *Clinical Assessments and statistical analysis*

Participants in JHS underwent a comprehensive history and physical exam at baseline exam. Current smoking status was obtained by questionnaire. Body mass index (BMI) was calculated using body weight indexed to height ( $\text{kg}/\text{m}^2$ ). Blood pressure was calculated by averaging two resting measurements. Hypertension was defined as systolic blood pressure of  $>140$  mmHg, diastolic blood pressure  $>90$  mmHg or use of anti-hypertensive medication. Diabetes mellitus status was determined by fasting glucose of  $>126$  mg/dl, hemoglobin A1c  $>6.5\%$  or use of anti-diabetic medication. High-density lipoprotein (HDL-C), total cholesterol, and creatinine were assayed directly using standard techniques<sup>23</sup>. Glomerular filtration rate was estimated by the chronic kidney disease epidemiologic collaboration (CKD-EPI) equation. Prevalent coronary heart disease status was assessed by questionnaire for history of myocardial infarction (MI), or evidence of MI on electrocardiogram. Associations between baseline clinical traits and non-targeted metabolite peaks were assessed using linear regression models adjusted for age, sex and batch (p value for significance ( $0.05/336$  non-targeted metabolite peaks) =  $1.5\text{E}-4$ ).

## *Review of prior metabolomics GWAS*

A manual review of the literature was performed for blood metabolomics GWAS excluding populations enriched for background traits. Lead candidate gene and metabolomic associations were cross-checked for novelty. The details of the reviewed studies are found below:

**Supplementary Table 3: Literature review of GWAS of blood metabolomics**

| <b>Metabolomics</b> | <b>Genotyping</b> | <b>Number of Metabolites</b> | <b>Cohort Size</b> | <b>Study</b>                                   |
|---------------------|-------------------|------------------------------|--------------------|------------------------------------------------|
| Known               | SNP array         | 363                          | 284                | Geiger et al. Plos Genetics, 2008              |
| Known               | SNP array         | 33 lipids +43 ratios         | 4,400              | Hicks et al. Plos Genetics, 2009               |
| Known               | imputation        | 163 metabolites              | 1,809              | Illig et al. Nature Genetics, 2010             |
| Known+ Unknown      | imputation        | >250 metabolites             | 2,820              | Suhre et. al. Nature, 2011                     |
| Known               | imputation        | 216                          | 8,330              | Kettunen et al. Nature Genetics, 2012          |
| Known               | imputation        | 153 lipids                   | 4304               | Demirkan et al. Plos Genetics, 2012            |
| Known               | imputation        | 216                          | 8330               | Tukainen et al., Human Molecular Genetics 2012 |
| Known               | imputation        | 130                          | 6600               | Inoiuye et al., Plos Genetics 2012             |
| Known + unknown     | imputation        | 517                          | 1768               | Krumsiek et al., Plos Genetics 2012            |
| Known + unknown     | imputation        | 163 + unknown peaks          | 1757               | Rafler et al. Genome Medicine, 2013            |
| Known               | imputation        | 217                          | 2076               | Rhee et al, Cell Metabolism 2013               |
| Known               | imputation        | 308                          | 1260               | Yu et al., Plos Genetics 2014                  |
| Known               | WGS               | 102 lipids                   | 3424               | Fefanova et al., Genetics, 2018                |
| Known + unknown     | imputation        | 529                          | 7824               | Shin et al., Nature Genetics, 2014             |
| Known               | Imputation        | 96                           | 2107               | Burkhardt et al., Plos Genetics, 2015          |
| Known               | Exome             | 217                          | 2016               | Rhee et al., Nature Communications, 2016       |
| Known               | Imputation        | 340 lipids                   | 5662               | Harshfield et al., BMC Genomics, 2021          |
| Known + unknown     | Exome             | 826                          | 614                | Yousri et al, Nature Communications, 2018      |
| Known               | Imputation        | 640                          | 3926               | Fefanova et al., AJHG, 2021                    |
| Known + unknown     | Imputation        | 1251                         | 451                | Barr et al, nature 2021                        |

|       |            |     |                        |                                     |
|-------|------------|-----|------------------------|-------------------------------------|
| Known | Imputation | 194 | 86,507 (meta-analysis) | Lotta et al., Nature genetics, 2021 |
|-------|------------|-----|------------------------|-------------------------------------|

**Supplemental Figure 1: Confirmation of metabolite identities with chemical standards.** Using commercially available standards, metabolite IDs were confirmed for 11 metabolites including 5,6 dihydrouridine, zeaxanthin, CAR(10:1), N-acetyl-D-galactosamine; oleoyl EA, CAR (DC6:0), linoleoyl glycine, beta-carotene; trans-retinol (testing of multiple retinol isomers against both QI176 and QI722 (trans-retinol), cholestanone and AICA-Riboside

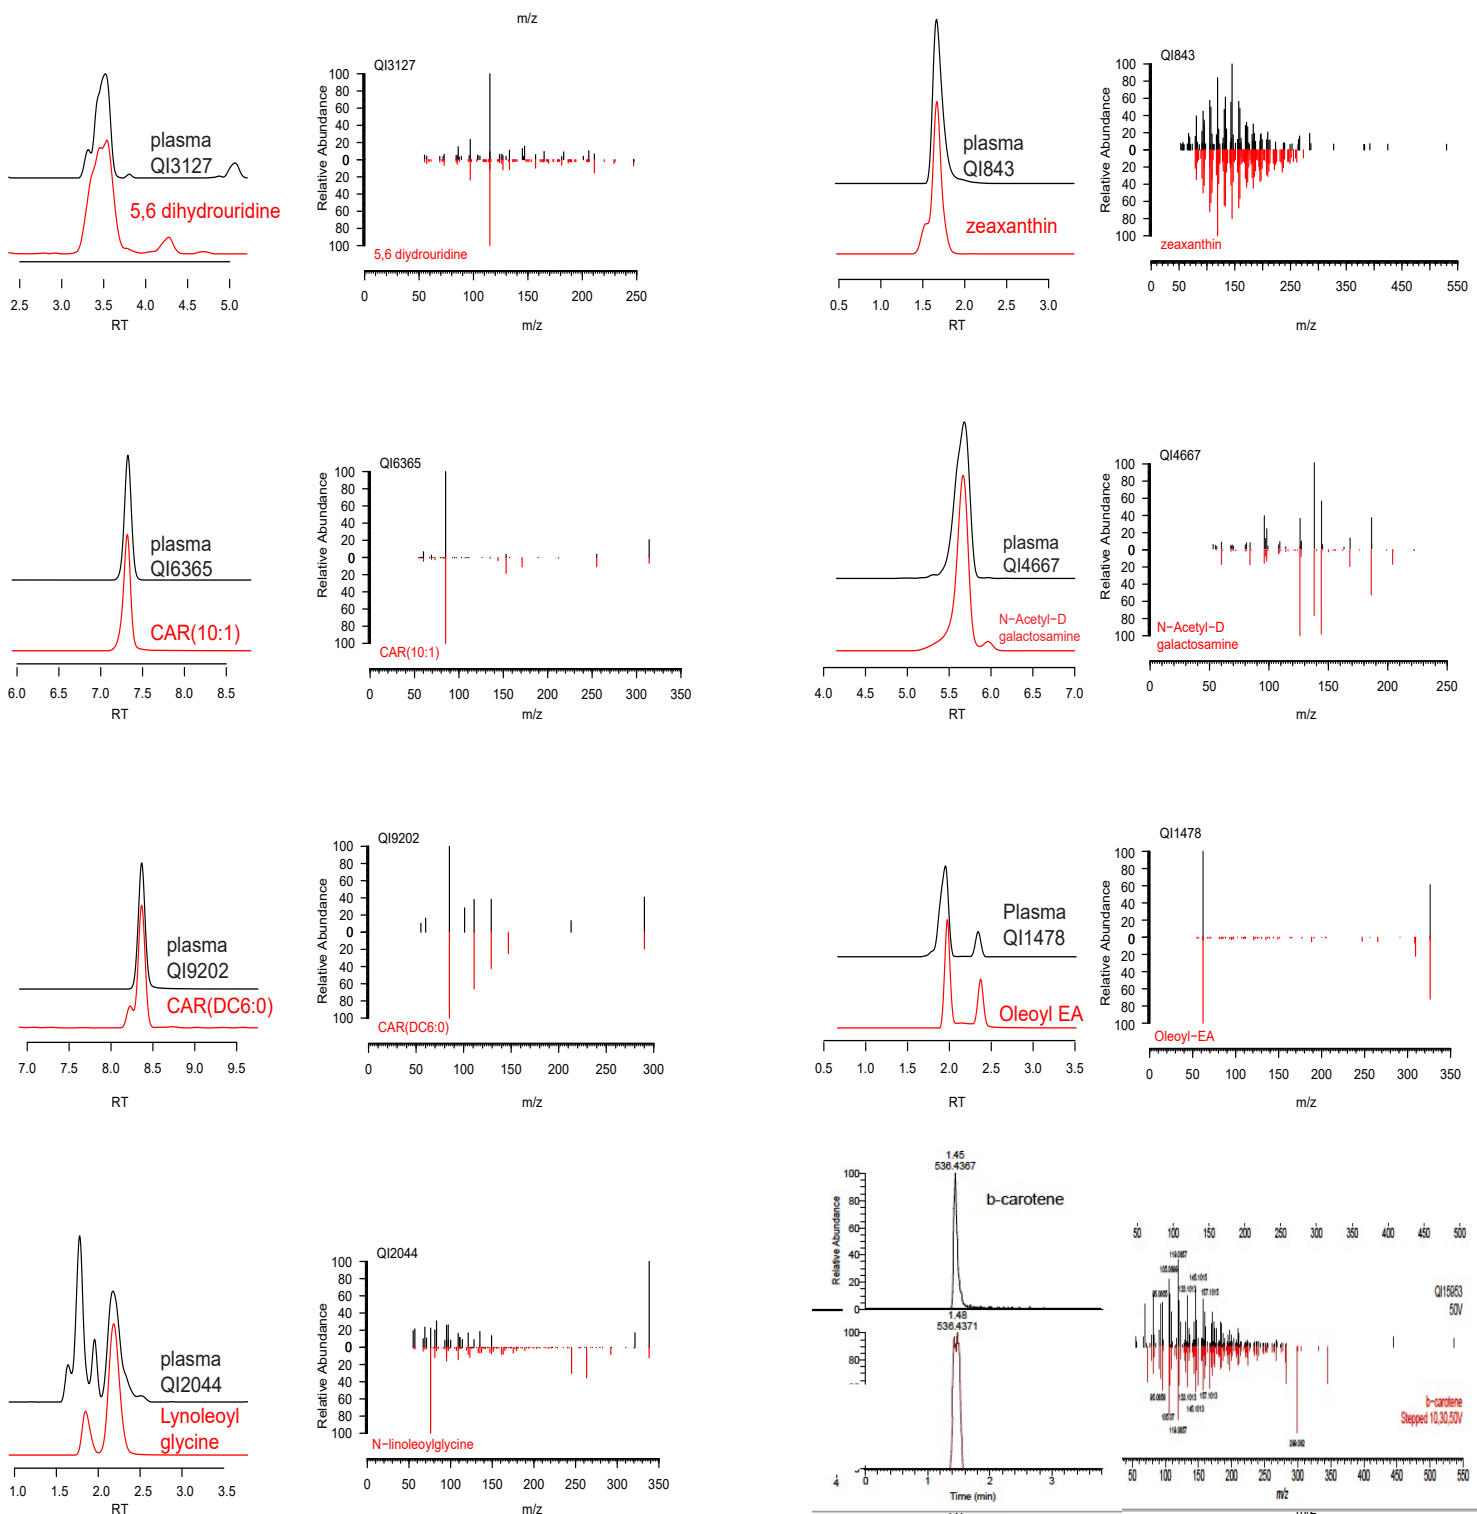

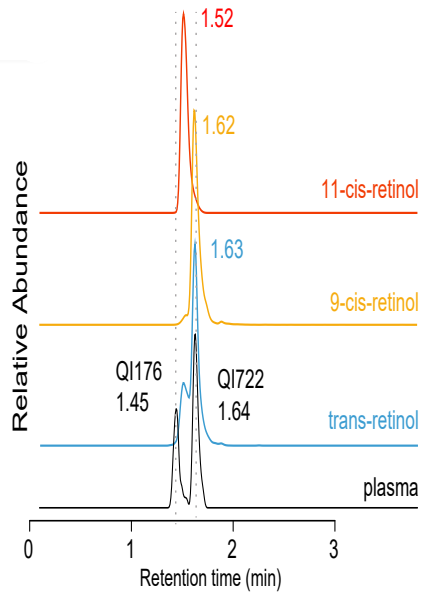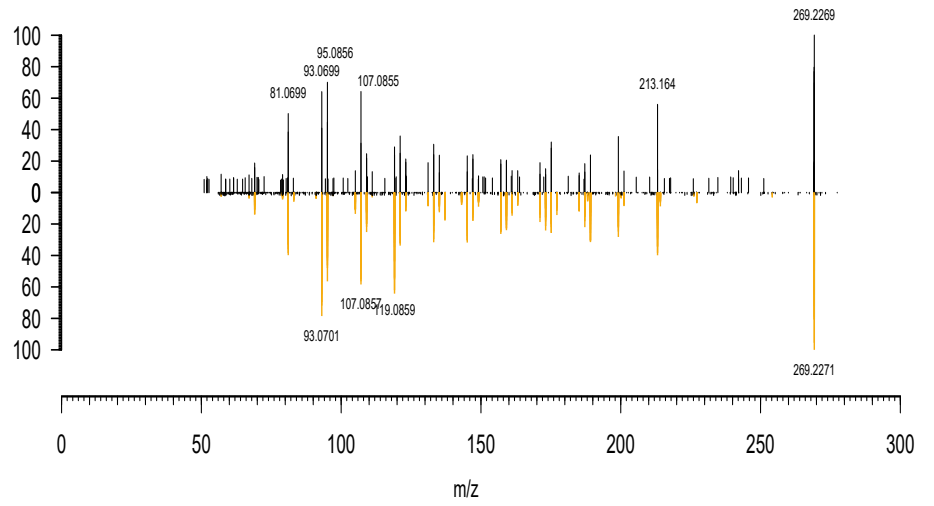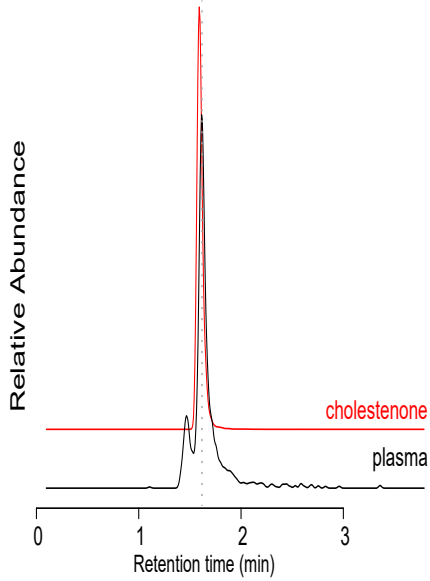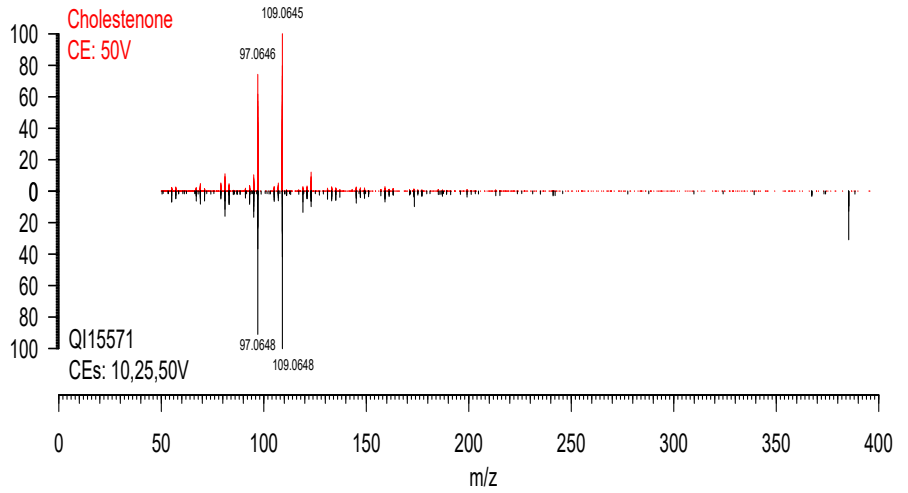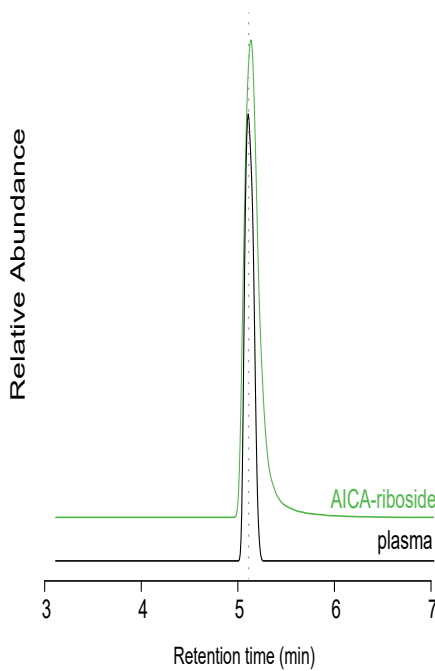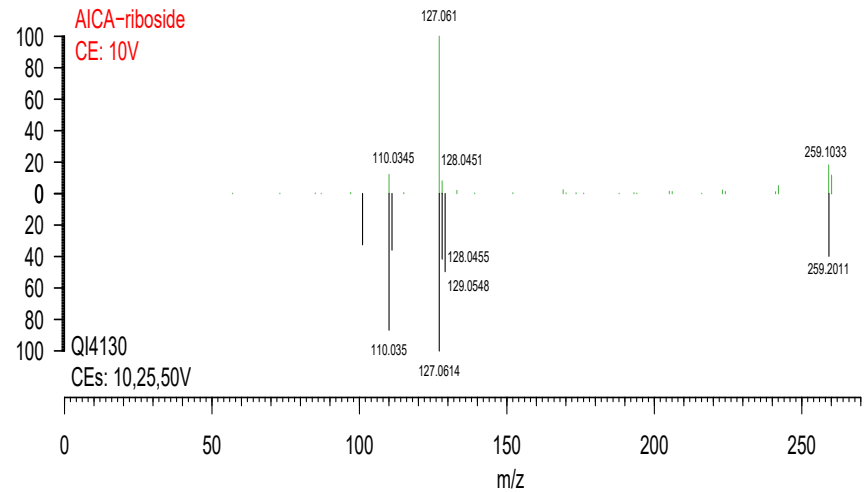

Supplement: 41467_2022_32275_MOESM1_ESM.pdf [file 41467_2022_32275_MOESM1_ESM.pdf]
