# Supplementary material for: Whole Genome Association Study of the Plasma Metabolome Identifies Metabolites Linked to Cardiometabolic Disease in Black Individuals
Source: PubMed Central journal article supplement (PMC9395431; doi:10.1038/s41467-022-32275-3), 2022-08-22
Supplement: 41467_2022_32275_MOESM2_ESM.pdf [file 41467_2022_32275_MOESM2_ESM.pdf]

### **Description of Additional Supplementary Files**

File Name: Supplementary Data 1

Description: Metabolite reporting standards including quality control metrics.

File Name: Supplementary Data 2

Description: Whole genome sequencing analysis of plasma metabolome (519 locus-metabolite associations).

File Name: Supplementary Data 3

Description: Unknown metabolite annotations using bioinformatic tools (SIRIUS, GNPS, HMDB, In-house library).

File Name: Supplementary Data 4

Description: Associations between Unknown Peaks and Clinical Phenotypes (Jackson Heart Study).

File Name: Supplementary Data 5

Description: Phenotypic associations with sentinel SNP's using Phenoscanner V2.

File Name: Supplementary Data 6

Description: MS/MS fragmentation data for high confidence metabolite predictions. DDA: data dependent acquisition; RT: retention time.

File Name: Supplementary Data 7

Description: Metabolite ID-GNPS Node Map.
